# Supplementary material for: A novel injection technique: using a field-based quantum cascade laser for the analysis of gas samples derived from static chambers
Source: Copernicus journal article supplement (doi:10.5194/amt-2020-197), 2020-06-04
Supplement: Supplementary file 1 [file amt-2020-197-supplement.pdf]

## Supplementary material

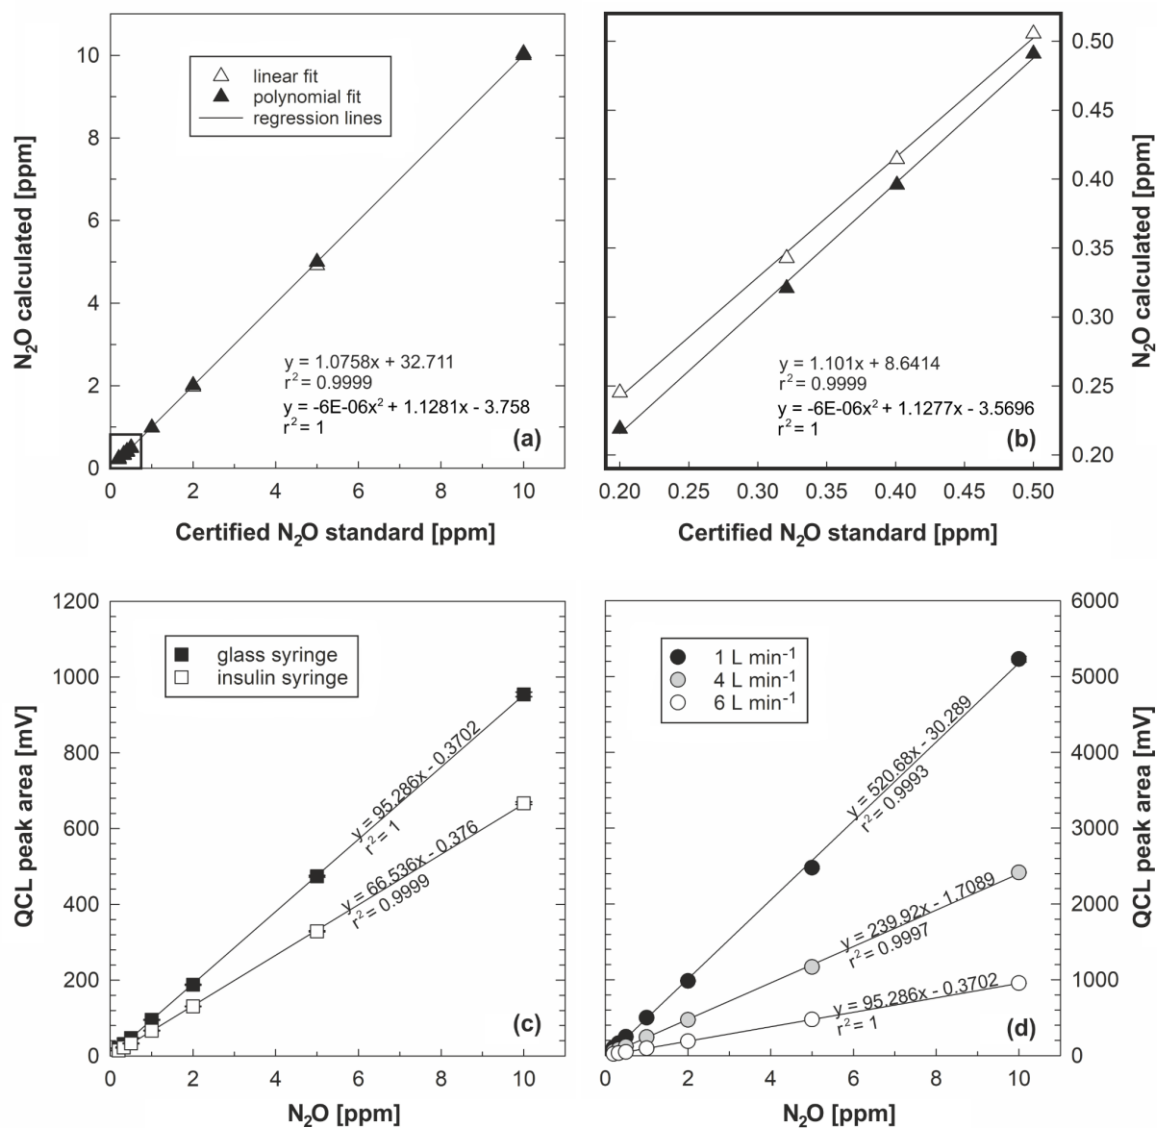

**Figure S1:** Tests conducted prior to the main study showing the calculated normal linear relationship between output peak area and  $N_2O$  concentration for different scenarios and for different ranges of  $N_2O$  standards injected (a) from 0.200 to 100 ppm and (b) from 0.200 to 5 ppm; regression lines in (c) illustrate the effect of using different syringe types on output peak area of the QCL; (d) demonstrates the effect of flow rate in  $L\ min^{-1}$  on the slope of associated regression lines and output peak area.

**Table S1:** Chronology of experimental activities.

10

| <b>Date</b> | <b>Activity</b>                                                                             |
|-------------|---------------------------------------------------------------------------------------------|
| 15-Aug-19   | Trial site fenced off<br>Preliminary injection into QCL:<br>testing different syringe types |
| 20-Aug-19   | Installation of chamber collars                                                             |
| 30-Aug-19   | Preliminary injections into QCL:<br>testing different flow rates                            |
| 10-Sep-19   | Treatment application to chamber<br>and soil plots<br>Gas and soil sampling – run 1         |
| 11-Sep-19   | Gas and soil sampling – run 2                                                               |
| 12-Sep-19   | Gas and soil sampling – run 3 & 4                                                           |
| 13-Sep-19   | Gas and soil sampling – run 5                                                               |
| 14-Sep-19   | Gas and soil sampling – run 6                                                               |
| 15-Sep-19   | Gas and soil sampling – run 7 & 8                                                           |
| 16-Sep-19   | Gas and soil sampling – run 9                                                               |

15 **Table S2:** Certified N<sub>2</sub>O standards used in this study and associated uncertainty levels. Certified N<sub>2</sub>O standard concentrations printed in bold font were used in quadratic curve models to calculate final sample N<sub>2</sub>O concentration.

| <b>N<sub>2</sub>O</b><br>[μL L <sup>-1</sup> ]<br>[ppmv] | <b>Uncertainty</b><br>[alpha/beta]<br>[%] | <b>Background</b><br>(gas) | <b>Company</b><br>(name) |
|----------------------------------------------------------|-------------------------------------------|----------------------------|--------------------------|
| <b>0.200</b>                                             | ± 0.01                                    | Nitrogen                   | BOC Ltd.                 |
| <b>0.321</b>                                             | ± 0.1–0.9%                                | Cryogenic<br>UltraPure Air | Praxair, Inc.            |
| <b>0.3252</b>                                            | ± 0.01                                    | Air                        | NIWA                     |
| <b>0.401</b>                                             | ± 0.1–0.9%                                | Cryogenic<br>UltraPure Air | Praxair, Inc.            |
| <b>0.500</b>                                             | ± 0.01                                    | Nitrogen                   | BOC Ltd.                 |
| <b>1.00</b>                                              | ± 0.01                                    | Nitrogen                   | BOC Ltd.                 |
| <b>2.00</b>                                              | ± 0.02                                    | Nitrogen                   | BOC Ltd.                 |
| <b>5.00</b>                                              | ± 0.1                                     | Nitrogen                   | BOC Ltd.                 |
| <b>10.00</b>                                             | ± 0.2                                     | Nitrogen                   | BOC Ltd.                 |
| 20.00                                                    | ± 0.2                                     | Nitrogen                   | BOC Ltd.                 |
| 50.00                                                    | ± 1.0                                     | Nitrogen                   | BOC Ltd.                 |
| 100.00                                                   | ± 1.0                                     | Nitrogen                   | BOC Ltd.                 |

**Table S3:** This table presents the measured values of nitrous oxide fluxes ( $F_{N_2O}$ ) analysed by GC and QCL, soil water-filled pore space (WFPS), soil ammonium ( $NH_4^+$ ) and nitrate ( $NO_3^-$ ) content of the control ( $AN_0$ ) and across the different treatments of ammonium-nitrate ( $AN_{300}$ ,  $AN_{600}$ ,  $AN_{900}$ ) applied. The associated standard error of the mean (SEM) is provided at the right hand side of each control/treatment column.

| <b>GC nitrous oxide flux</b> [ $F_{N_2O\_GC}$ in $nmol\ N_2O\ m^{-2}\ s^{-1}$ ]   |        |      |            |      |            |       |            |       |
|-----------------------------------------------------------------------------------|--------|------|------------|------|------------|-------|------------|-------|
| date                                                                              | $AN_0$ | SEM  | $AN_{300}$ | SEM  | $AN_{600}$ | SEM   | $AN_{900}$ | SEM   |
| 10-Sep-2019                                                                       | 0.04   | 0.05 | 3.56       | 1.20 | 1.95       | 0.19  | 2.49       | 0.52  |
| 11-Sep-2019                                                                       | 0.13   | 0.04 | 9.93       | 1.97 | 9.63       | 3.44  | 14.88      | 3.55  |
| 12-Sep-2019*                                                                      | 0.06   | 0.05 | 8.67       | 1.73 | 8.02       | 2.92  | 15.87      | 3.96  |
| 12-Sep-2019*                                                                      | 0.06   | 0.01 | 8.42       | 2.62 | 8.19       | 3.23  | 14.87      | 3.15  |
| 13-Sep-2019                                                                       | -0.05  | 0.03 | 6.43       | 3.00 | 11.57      | 3.68  | 15.16      | 3.76  |
| 14-Sep-2019                                                                       | 0.03   | 0.01 | 7.46       | 2.19 | 10.71      | 3.43  | 16.71      | 2.46  |
| 15-Sep-2019*                                                                      | 0.02   | 0.03 | 5.03       | 0.80 | 10.21      | 2.84  | 14.85      | 3.58  |
| 15-Sep-2019*                                                                      | 0.03   | 0.03 | 6.92       | 1.57 | 9.98       | 2.96  | 13.88      | 2.75  |
| 16-Sep-2019                                                                       | 0.02   | 0.04 | 3.06       | 1.33 | 6.37       | 2.45  | 10.29      | 1.67  |
| <b>QCL nitrous oxide flux</b> [ $F_{N_2O\_QCL}$ in $nmol\ N_2O\ m^{-2}\ s^{-1}$ ] |        |      |            |      |            |       |            |       |
| 10-Sep-2019                                                                       | 0.00   | 0.03 | 3.65       | 1.18 | 2.17       | 0.19  | 2.74       | 0.60  |
| 11-Sep-2019                                                                       | 0.21   | 0.05 | 9.40       | 1.83 | 8.88       | 3.14  | 13.57      | 3.04  |
| 12-Sep-2019*                                                                      | 0.14   | 0.07 | 8.19       | 1.60 | 7.94       | 2.92  | 15.17      | 3.71  |
| 12-Sep-2019*                                                                      | 0.06   | 0.02 | 8.02       | 2.47 | 8.04       | 3.11  | 15.46      | 3.57  |
| 13-Sep-2019                                                                       | 0.09   | 0.08 | 6.25       | 2.77 | 10.91      | 3.33  | 15.09      | 4.05  |
| 14-Sep-2019                                                                       | 0.03   | 0.02 | 7.30       | 2.10 | 10.66      | 3.24  | 17.22      | 2.71  |
| 15-Sep-2019*                                                                      | 0.17   | 0.01 | 5.30       | 0.86 | 9.46       | 2.42  | 14.81      | 3.65  |
| 15-Sep-2019*                                                                      | 0.18   | 0.03 | 6.95       | 1.33 | 10.27      | 2.89  | 14.36      | 2.69  |
| 16-Sep-2019                                                                       | 0.06   | 0.01 | 3.28       | 1.63 | 6.63       | 2.51  | 10.97      | 1.99  |
| <b>Water filled pore space of the soil [%]</b>                                    |        |      |            |      |            |       |            |       |
| 10-Sep-2019                                                                       | 79.43  | 0.48 | 78.66      | 1.82 | 78.06      | 1.40  | 82.30      | 2.35  |
| 11-Sep-2019                                                                       | 81.64  | 0.59 | 84.97      | 1.68 | 80.16      | 0.53  | 82.13      | 1.79  |
| 12-Sep-2019                                                                       | 82.18  | 1.12 | 80.63      | 1.23 | 79.35      | 1.05  | 79.20      | 1.00  |
| 13-Sep-2019                                                                       | 79.62  | 0.95 | 79.72      | 1.87 | 76.62      | 2.08  | 78.13      | 1.76  |
| 14-Sep-2019                                                                       | 79.43  | 0.56 | 80.60      | 2.00 | 78.37      | 1.74  | 77.78      | 1.19  |
| 15-Sep-2019                                                                       | 79.79  | 0.50 | 81.70      | 2.65 | 77.17      | 1.49  | 76.81      | 0.37  |
| 16-Sep-2019                                                                       | 77.92  | 1.06 | 81.05      | 1.98 | 73.93      | 1.60  | 77.41      | 1.80  |
| <b>Soil ammonium</b> [ $kg\ NH_4^+\ ha^{-1}$ ]                                    |        |      |            |      |            |       |            |       |
| 10-Sep-2019                                                                       | 1.82   | 0.50 | 81.73      | 5.20 | 89.36      | 2.72  | 264.63     | 17.19 |
| 11-Sep-2019                                                                       | 0.81   | 0.11 | 52.26      | 7.18 | 141.51     | 11.08 | 233.63     | 33.62 |
| 12-Sep-2019                                                                       | 2.15   | 0.57 | 44.61      | 6.52 | 109.37     | 6.77  | 213.76     | 3.41  |
| 13-Sep-2019                                                                       | 2.21   | 0.33 | 36.88      | 6.75 | 124.48     | 9.36  | 194.76     | 18.88 |
| 14-Sep-2019                                                                       | 3.71   | 0.09 | 20.31      | 5.07 | 59.88      | 6.05  | 188.70     | 18.05 |
| 15-Sep-2019                                                                       | 1.84   | 0.64 | 9.58       | 0.99 | 78.98      | 12.30 | 155.84     | 18.49 |
| 16-Sep-2019                                                                       | 1.80   | 0.29 | 13.21      | 3.23 | 38.50      | 4.59  | 124.38     | 7.64  |

**Soil nitrate [kg NO<sub>3</sub><sup>-</sup> ha<sup>-1</sup>]**

|             |      |      |       |       |        |      |        |       |
|-------------|------|------|-------|-------|--------|------|--------|-------|
| 10-Sep-2019 | 2.99 | 0.37 | 83.67 | 3.87  | 104.95 | 1.33 | 267.77 | 15.17 |
| 11-Sep-2019 | 2.46 | 0.18 | 69.08 | 6.54  | 149.95 | 8.62 | 248.89 | 33.69 |
| 12-Sep-2019 | 2.29 | 0.07 | 79.41 | 6.57  | 142.52 | 8.61 | 230.94 | 7.36  |
| 13-Sep-2019 | 1.64 | 0.20 | 82.21 | 7.92  | 149.85 | 6.25 | 232.40 | 13.77 |
| 14-Sep-2019 | 1.84 | 0.35 | 73.37 | 12.71 | 114.20 | 8.41 | 237.77 | 8.96  |
| 15-Sep-2019 | 2.47 | 0.31 | 78.91 | 1.51  | 162.60 | 8.72 | 231.51 | 16.94 |
| 16-Sep-2019 | 1.85 | 0.22 | 92.49 | 16.22 | 134.38 | 7.60 | 211.88 | 18.92 |

\* flux measurements conducted twice daily at 10 AM and 12 PM

SEM = standard error of the mean

30

35

40

45

50

55 **Table S4:** Results from the linear functional relationship analysis (orthogonal regression). Columns labelled C<sub>N2O</sub> show results of the regression analysis when using standardised N<sub>2</sub>O concentrations. Columns labelled F<sub>N2O</sub> provide results based on standardised N<sub>2</sub>O fluxes. Part of the regression analysis was to characterise both data streams by treatment and control, i.e. first including all data (AN<sub>0</sub>, AN<sub>300</sub>, AN<sub>600</sub>, AN<sub>900</sub>) in the analysis and then, separately, only the control (AN<sub>0</sub>).

|                                    | C <sub>N2O</sub><br>all AN | C <sub>N2O</sub><br>AN <sub>0</sub> only | F <sub>N2O</sub><br>all AN | F <sub>N2O</sub><br>AN <sub>0</sub> only |
|------------------------------------|----------------------------|------------------------------------------|----------------------------|------------------------------------------|
| Number of observations             | 432                        | 108                                      | 108                        | 27                                       |
| Response mean                      | -0.003164                  | 0.3272                                   | -0.004008                  | 0.3776                                   |
| Explanatory mean                   | 0.003164                   | -0.3272                                  | 0.004008                   | -0.3776                                  |
| Response variance                  | 0.9811                     | 1.238                                    | 0.9860                     | 1.139                                    |
| Explanatory variance               | 1.021                      | 0.5551                                   | 1.023                      | 0.6029                                   |
| r <sup>2</sup> value               | 0.9928                     | 0.1753                                   | 0.9922                     | 0.0939                                   |
| r value                            | 0.9964                     | 0.4187                                   | 0.9961                     | 0.3064                                   |
| Angle between Y on X<br>and X on Y | 0.2068                     | 42.32                                    | 0.2229                     | 54.59                                    |
| Major eigenvalue                   | 1.999                      | 1.384                                    | 2.005                      | 1.241                                    |
| Minor eigenvalue                   | 0.003606                   | 0.4096                                   | 0.003901                   | 0.5017                                   |
| Bootstrap resampling               | 200                        | 200                                      | 200                        | 200                                      |
| <i>Ordinary least squares:</i>     |                            |                                          |                            |                                          |
| Constant                           | -0.006253                  | 0.532                                    | -0.007926                  | 0.537                                    |
| Standard error                     | 0.003914                   | 0.1038                                   | 0.007861                   | 0.26                                     |
| Lower                              | -0.01331                   | 0.3101                                   | -0.02204                   | -0.02                                    |
| Upper                              | 0.001710                   | 0.734                                    | 0.006998                   | 1.030                                    |
| Slope                              | 0.9766                     | 0.625                                    | 0.9778                     | 0.421                                    |
| <i>Inverse least squares:</i>      |                            |                                          |                            |                                          |
| Constant                           | -0.006276                  | 1.49                                     | -0.007957                  | 2.072                                    |
| Standard error                     | 0.003902                   | 0.6585                                   | 0.007902                   | 82.46                                    |
| Lower                              | -0.01369                   | 0.9211                                   | -0.02246                   | -44.95                                   |
| Upper                              | 0.001786                   | 3.478                                    | 0.007118                   | 18.732                                   |
| Slope                              | 0.9837                     | 3.567                                    | 0.9854                     | 4.486                                    |
| <i>Major axis:</i>                 |                            |                                          |                            |                                          |
| Constant                           | -0.006264                  | 1.108                                    | -0.007941                  | 1.326                                    |
| Standard error                     | 0.003904                   | 0.44                                     | 0.007872                   | 40.17                                    |
| Lower                              | -0.01349                   | 0.7105                                   | -0.02217                   | -19.84                                   |
| Upper                              | 0.001610                   | 2.484                                    | 0.006920                   | 9.937                                    |
| Slope                              | 0.9801                     | 2.387                                    | 0.9815                     | 2.511                                    |

**Table S5:** Bland-Altman analysis for  $F_{N_{2O\_GC}}$  and  $F_{N_{2O\_QCL}}$  distinguished by treatment in units  $\text{nmol m}^{-2} \text{s}^{-1}$ , if not specified otherwise. This table provides a summary based on mean  $F_{N_{2O\_GC}}$  and  $F_{N_{2O\_QCL}}$  across replicates of the same treatment. Fig. 4, instead, illustrates the results of individual  $F_{N_{2O\_GC}}$  and  $F_{N_{2O\_QCL}}$  (not depicted in the below table) for each replicate and each treatment as the percentage mean difference between the two methods, i.e. GC (A) and QCL (B).

| <b>Sampling</b> | <b>Treatment</b>         | <b>GC (A)</b>    | <b>QCL (B)</b>    | <b>Mean</b> | <b>Difference</b> | <b>Difference (%)</b> |
|-----------------|--------------------------|------------------|-------------------|-------------|-------------------|-----------------------|
| [No.]           | [kg N ha <sup>-1</sup> ] | $F_{N_{2O\_GC}}$ | $F_{N_{2O\_QCL}}$ | (A+B)/2     | (A-B)             | ((A-B)/mean)*100      |
| 1               | 0                        | 0.04             | 0.00              | 0.02        | 0.04              | 182.48                |
| 1               | 300                      | 3.56             | 3.65              | 3.61        | -0.09             | -2.59                 |
| 1               | 600                      | 1.95             | 2.17              | 2.06        | -0.23             | -11.11                |
| 1               | 900                      | 2.49             | 2.74              | 2.61        | -0.24             | -9.24                 |
| 2               | 0                        | 0.13             | 0.21              | 0.17        | -0.08             | -44.70                |
| 2               | 300                      | 9.93             | 9.40              | 9.67        | 0.53              | 5.51                  |
| 2               | 600                      | 9.63             | 8.88              | 9.26        | 0.75              | 8.11                  |
| 2               | 900                      | 14.88            | 13.57             | 14.22       | 1.31              | 9.20                  |
| 3               | 0                        | 0.06             | 0.14              | 0.10        | -0.08             | -78.52                |
| 3               | 300                      | 8.67             | 8.19              | 8.43        | 0.48              | 5.69                  |
| 3               | 600                      | 8.02             | 7.94              | 7.98        | 0.08              | 0.98                  |
| 3               | 900                      | 15.87            | 15.17             | 15.52       | 0.70              | 4.51                  |
| 4               | 0                        | 0.06             | 0.06              | 0.06        | 0.00              | 1.93                  |
| 4               | 300                      | 8.42             | 8.02              | 8.22        | 0.39              | 4.79                  |
| 4               | 600                      | 8.19             | 8.04              | 8.11        | 0.15              | 1.82                  |
| 4               | 900                      | 14.87            | 15.46             | 15.16       | -0.59             | -3.89                 |
| 5               | 0                        | -0.05            | 0.09              | 0.02        | -0.14             | -595.36               |
| 5               | 300                      | 6.43             | 6.25              | 6.34        | 0.18              | 2.88                  |
| 5               | 600                      | 11.57            | 10.91             | 11.24       | 0.66              | 5.88                  |
| 5               | 900                      | 15.16            | 15.09             | 15.13       | 0.07              | 0.49                  |
| 6               | 0                        | 0.03             | 0.03              | 0.03        | 0.00              | 4.14                  |
| 6               | 300                      | 7.46             | 7.30              | 7.38        | 0.16              | 2.19                  |
| 6               | 600                      | 10.71            | 10.66             | 10.68       | 0.05              | 0.47                  |
| 6               | 900                      | 16.71            | 17.22             | 16.96       | -0.51             | -3.02                 |
| 7               | 0                        | 0.02             | 0.17              | 0.09        | -0.15             | -157.04               |
| 7               | 300                      | 5.03             | 5.30              | 5.17        | -0.27             | -5.22                 |
| 7               | 600                      | 10.21            | 9.46              | 9.84        | 0.75              | 7.67                  |
| 7               | 900                      | 14.85            | 14.81             | 14.83       | 0.03              | 0.22                  |
| 8               | 0                        | 0.03             | 0.18              | 0.10        | -0.15             | -149.70               |
| 8               | 300                      | 6.92             | 6.95              | 6.94        | -0.02             | -0.34                 |
| 8               | 600                      | 9.98             | 10.27             | 10.13       | -0.29             | -2.86                 |
| 8               | 900                      | 13.88            | 14.36             | 14.12       | -0.48             | -3.39                 |

|   |     |       |       |       |       |         |
|---|-----|-------|-------|-------|-------|---------|
| 9 | 0   | 0.02  | 0.06  | 0.04  | -0.04 | -105.26 |
| 9 | 300 | 3.06  | 3.28  | 3.17  | -0.22 | -6.86   |
| 9 | 600 | 6.37  | 6.63  | 6.50  | -0.26 | -4.02   |
| 9 | 900 | 10.29 | 10.97 | 10.63 | -0.68 | -6.39   |

70

75

80

85

90

95

**Table S6:** Bioequivalence analysis for N<sub>2</sub>O concentrations (C<sub>N2O</sub>) and associated fluxes (F<sub>N2O</sub>) in bottom panel of the table). C<sub>N2O\_QCL</sub> and F<sub>N2O\_QCL</sub> were considered bioequivalent when the 90% confidence interval of the difference was completely within the predefined  $\pm 5\%$  bioequivalence range of difference to C<sub>N2O\_GC</sub> and F<sub>N2O\_GC</sub> (corresponding to a test with size 0.05). rep. = replicates, d.f = degrees of freedom, s.e.d = standard error of the difference, LSD = least significant difference

| Time/<br>Treatment      | Mean                         |                                                          | Standard error of the<br>difference of the mean |     | LSD    | 90% confidence interval |                        | Bioequivalence range |        |             |             |              |              |       |
|-------------------------|------------------------------|----------------------------------------------------------|-------------------------------------------------|-----|--------|-------------------------|------------------------|----------------------|--------|-------------|-------------|--------------|--------------|-------|
|                         | C <sub>N2O_GC</sub><br>[ppm] | C <sub>N2O_QCL</sub><br>[ppm]                            | rep.                                            | d.f |        | s.e.d                   | difference<br>(GC-QCL) | lower                | upper  | GC<br>lower | GC<br>upper | QCL<br>lower | QCL<br>upper |       |
| <b>AN<sub>0</sub></b>   | t <sub>0</sub>               | 0.333                                                    | 0.332                                           | 27  | 26     | 0.0027                  | 0.0046                 | 0.000                | -0.004 | 0.005       | -0.017      | 0.017        | -0.017       | 0.017 |
|                         | t <sub>15</sub>              | 0.333                                                    | 0.342                                           | 27  | 26     | 0.0028                  | 0.0048                 | -0.009               | -0.013 | -0.004      | -0.017      | 0.017        | -0.017       | 0.017 |
|                         | t <sub>30</sub>              | 0.335                                                    | 0.352                                           | 27  | 26     | 0.0029                  | 0.0049                 | -0.016               | -0.021 | -0.012      | -0.017      | 0.017        | -0.017       | 0.018 |
|                         | t <sub>45</sub>              | 0.340                                                    | 0.354                                           | 27  | 26     | 0.0027                  | 0.0046                 | -0.014               | -0.019 | -0.009      | -0.017      | 0.017        | -0.017       | 0.018 |
|                         | <b>AN<sub>300</sub></b>      | 0.333                                                    | 0.336                                           | 27  | 26     | 0.0028                  | 0.0048                 | -0.003               | -0.007 | 0.002       | -0.017      | 0.017        | -0.017       | 0.017 |
| <b>AN<sub>600</sub></b> | t <sub>0</sub>               | 0.822                                                    | 0.821                                           | 27  | 26     | 0.1090                  | 0.0186                 | 0.001                | -0.017 | 0.020       | -0.041      | 0.041        | -0.041       | 0.041 |
|                         | t <sub>15</sub>              | 1.341                                                    | 1.327                                           | 27  | 26     | 0.0168                  | 0.0286                 | 0.014                | -0.015 | 0.042       | -0.067      | 0.067        | -0.066       | 0.066 |
|                         | t <sub>30</sub>              | 1.831                                                    | 1.804                                           | 27  | 26     | 0.0192                  | 0.0327                 | 0.026                | -0.007 | 0.059       | -0.092      | 0.092        | -0.090       | 0.090 |
|                         | t <sub>45</sub>              | 0.336                                                    | 0.335                                           | 27  | 26     | 0.0023                  | 0.0042                 | 0.001                | -0.003 | 0.005       | -0.017      | 0.017        | -0.017       | 0.017 |
|                         | <b>AN<sub>900</sub></b>      | 0.912                                                    | 0.912                                           | 27  | 26     | 0.0160                  | 0.0273                 | 0.000                | -0.027 | 0.027       | -0.046      | 0.046        | -0.046       | 0.046 |
| <b>Treatment</b>        | t <sub>0</sub>               | 1.563                                                    | 1.550                                           | 27  | 26     | 0.0242                  | 0.0412                 | 0.013                | -0.028 | 0.054       | -0.078      | 0.078        | -0.078       | 0.078 |
|                         | t <sub>15</sub>              | 2.143                                                    | 2.104                                           | 27  | 26     | 0.0250                  | 0.0427                 | 0.039                | -0.004 | 0.082       | -0.107      | 0.107        | -0.105       | 0.105 |
|                         | t <sub>30</sub>              | 0.338                                                    | 0.337                                           | 27  | 26     | 0.0028                  | 0.0319                 | 0.001                | -0.004 | 0.005       | -0.017      | 0.017        | -0.017       | 0.017 |
|                         | t <sub>45</sub>              | 1.285                                                    | 1.268                                           | 27  | 26     | 0.0136                  | 0.1380                 | 0.017                | -0.006 | 0.041       | -0.064      | 0.064        | -0.063       | 0.063 |
|                         | <b>AN<sub>300</sub></b>      | 2.338                                                    | 2.294                                           | 27  | 26     | 0.0325                  | 0.1959                 | 0.044                | -0.012 | 0.100       | -0.117      | 0.117        | -0.115       | 0.115 |
| <b>Treatment</b>        | t <sub>0</sub>               | 3.370                                                    | 3.379                                           | 27  | 26     | 0.3900                  | 0.2850                 | -0.009               | -0.076 | 0.058       | -0.169      | 0.169        | -0.169       | 0.169 |
|                         | t <sub>15</sub>              | F <sub>N2O_GC</sub>                                      | F <sub>N2O_QCL</sub>                            |     |        |                         |                        |                      |        |             |             |              |              |       |
|                         | t <sub>30</sub>              | [mmol N <sub>2</sub> O m <sup>-2</sup> s <sup>-1</sup> ] |                                                 |     |        |                         |                        |                      |        |             |             |              |              |       |
|                         | t <sub>45</sub>              | 0.0387                                                   | 0.1048                                          | 27  | 26     | 0.0187                  | 0.0319                 | -0.066               | -0.098 | -0.034      | -0.002      | 0.002        | -0.005       | 0.005 |
|                         | <b>AN<sub>300</sub></b>      | 6.610                                                    | 6.483                                           | 27  | 26     | 0.0809                  | 0.1380                 | 0.127                | -0.011 | 0.265       | -0.331      | 0.331        | -0.324       | 0.324 |
| <b>AN<sub>600</sub></b> | 8.514                        | 8.329                                                    | 27                                              | 26  | 0.1149 | 0.1959                  | 0.185                  | -0.011               | 0.381  | -0.426      | 0.426       | -0.416       | 0.416        |       |
|                         | 13.222                       | 13.265                                                   | 27                                              | 26  | 0.1671 | 0.2850                  | -0.043                 | -0.328               | 0.242  | -0.661      | 0.661       | -0.663       | 0.663        |       |
